# Supplementary material for: Systematics and diversification of the Ichthyomyini (Cricetidae, Sigmodontinae) revisited: evidence from molecular, morphological, and combined approaches
Source: PeerJ. 2023 Jan 13;11:e14319. doi: 10.7717/peerj.14319 (PMC9841913; doi:10.7717/peerj.14319)
Supplement: Supplemental Information 4 — Character and character state descriptions in the main text. The table also also includes the character state distribution for specimen LSUMZ Mammals 14406. [file peerj-11-14319-s004.xlsx]

## Sheet: Final Consensus
	General	External														Cranial														Dental																			Soft
	1	2	3	4	5	6	7	8	9	10	11	12	13	14	15	16	17	18	19	20	21	22	23	24	25	26	27	28	29	30	31	32	33	34	35	36	37	38	39	40	41	42	43	44	45	46	47	48	49
Anotomys leander	0	1	0	2	1	0	1	2	0	1	1	1	1	1	1	0	1	0	2	1	0	0	1	0	0	0	1	1	0	0	0	0	1	0	0	1	0	0	0	?	1	0	0	0	0	1	1	0	1
Chibchanomys trichotis	0	1	0	2	0	0	1	1	1	0	2	1	1	1	1	0	1	0	1/2	1	0	1	0	1	1	1	1	0	0	0	0	0	?	0/1	0/1	1	1	1	1	0	0	0	0	0	0	1	0	1	0
Chibchanomys orcesi	0	1	0	1	0	0/2	0	1	1	0	0	0	0	0	1	0	0	0	1	1	0	1	0	0	0	1	1	1	0	0	0	1	0	1	1	1	1	1	1	?	0	0	1	0	1	1	1	1	0
Ichthyomys hydrobates	1	0	1	2	0	0/1	0	1	1	0	2	1	1	0	1	1	0	1	0	0	1	3	2	0	1	0/1	0	1	1	1	1	1	0	1	1	1	1	1	1	0	1	0	0	1	1	0	1	0	0
Ichthyomys stolzmanni	1	0	1	2	0/1	1	0	1	1	0	2	1	1	0	1	1	0	1	0	0	1	3	2	0	0/1	0	1	1	1	1	1	1	0	1	1	1	1	1	1	?	1	0	0	1	1	0	1	0	0
Ichthyomys pittieri	1	0	1	2	0	0	0	1	1	0	2	1	1	0	1	1	0	1	0	0	1	3	2	0	0/1	0	1	1	1	1	1	0	0	1	1	1	1	1	1	?	1	0/1	0	1	1	0	1	1	0
Ichthyomys tweedii	1	0	1	2	0	0	0	1	1	0	2	1	1	0	0	1	0	1	0	0	1	3	2	0	1	0	0	1	1	1	1	1	0	1	1	1	1	1	1	0	1	0	0	1	1	0	1	0	0
Ichthyomys pinei	1	0	1	2	0	2	0	1	1	0	2	1	1	0	0	1	0	1	0	?	1	3	?	?	1	0	?	?	1	1	1	1	0	?	?	1	1	1	1	?	1	0	0	1	1	0	1	0	?
Ichthyomys orientalis	1	0	1	2	0	0/1	0	1	1	0	2	1	1	0	0	1	0	1	0	0	1	3	2	0	1	0	0	0	1	1	1	1	0	1	1	1	1	1	1	?	1	0	0	1	1	0	1	0	?
Neusticomys monticolus	0	1	0	0	0	0	0	0	1	0	0	0	0	0	0	0	0	0	1	1	0	1	0	0	0	0/1	1	0	0/1	0	0	0	0	0/1	1	0	1	1	1	1	1	0	1	0	0	0	0	0	0
Neusticomys vossi	0	1	0	0	0	0	0	0	1	0	0	0	0	0	0	0	0	0	1	1	0	1	0	0	0	1	1	0	1	0	0	1	0	1	1	0	1	1	1	?	0	0	1	0	0	0	0	0	0
Neusticomys mussoi	0	1	0	0	0	0	0	0	1	0	0	0	0	0	0	0	0	0	0	1	0	1	0	0	0	1	1	0	?	0	0	1	0	?	0	?	1	1	1	?	1	0	1	?	0	1	1	1	0
Daptomys venezuelae	1	0	0	0	0	0	0	0	1	0	0	0	0	0	0	1	0	0	0	0	0	1	0	1	0	0/1	1	1	1	1	0	1	0	0	0	1	1	0	1	?	0	0	0	1	0	1	1	1	0
Daptomys oyapocki	0	0	0	0	0	0	0	0	1	0	0	0	0	0	0	1	0	0	0	0	0	1	0	1	1	?	?	?	?	1	0	0	0	0	?	1	1	0	1	?	0	1	nc	1	0	1	1	1	0
Daptomys ferreirai	0	0	0	1	0	0	0	0	1	0	0	0	0	0	0	1	0	0	0	0	0	1	0	1	1	0/1	1	1	1	1	0	1	0	0	0	0	1	0	1	?	0	0/1	1	0	1	1	1	1	?
Daptomys peruviensis	0	0	0	1	0	0	0	0	1	0	0	0	0	0	0	1	0	0	0	0	0	1	0	1	1	0/1	1	1	1	1	0	1	0	0	1	0	1	0	1	?	1	0	1	0	1	1	0	1	0
Rheomys mexicanus	1	1	1	2	0	0/1	1	1	1	2	2	1	1	0	1	0	1	0	1	1	0	2	2	0	1	1	0	0	1	0	0	0	1	0	0	0	0	1	1	1	0	0	1	0	0	1	1	1	1
Rheomys raptor	0	1	0	0	0	0	0	0	1	2	2	1	1	0	0	0	1	0	1	1	0	2	2	0	1	0/1	1	1	1	0	0	0	0	0	?	0	1	1	1	1	1	0	0	0	0	0	1	0	0
Rheomys thomasi	0	0	0	1	0	0	0	0	1	2	1	0	0	0	0	0	1	0	1	1	0	2	2	0	1	1	1	0/1	1	0	0	0	0	1	1	1	1	1	1	?	1	0	0	1	0	0	1	0	0
Rheomys underwoodi	1	1	1	2	0	1	1	1	1	2	2	1	1	0	1	0	1	0	1	1	0	2	2	0	1	1	1	1	0	0	0	0	0	1	1	?	1	1	1	?	1	0	0	1	0	1	0	0	0
"Chibchanomys" sp. (Perú)	0	1	0	0	0	0	1	1	1	0	2	1	1	1	1	0	1	0	1	1	0	1	0	1	1	1	1	0	0	0	0	0	0	1	1	1	1	1	0	?	0	0/1	0	0	0	1	1	1	0
"Chibchanomys" sp. (Perú LSU14406)	0	1	0	0	0	0	1	1	1	0	2	1	1	?	?	0	1	0	1	1	0	1	0	1	1	1	1	1	0	0	0	0	0	1	1	0	1	1	0	?	0	0	0	0	0	1	1	1	?
Neusticomys sp. (Colombia)	0	1	1	1	0	0	0	0	1	0	0	0	0	0	0	0	0	0	1	0	0	1	0	0	0	1	1	0	0	0	0	1	0	1	?	0	1	1	1	?	1	0	1	0	0	0	?	1	?
Daptomys sp. (Bolivia)	0	0	1	0	0	2	?	0	1	0	0	0	0	?	0	1	0	0	0	?	0	1	?	1	1	?	1	1	1	1	0	1	0	1	1	?	1	0	1	?	1	0	1	1	1	1	?	1	?
[truncated: 7 more columns]
